# Supplementary material
Source: publisher figshare collection journal article supplement (https://karger.figshare.com/ndownloader/files/22475981)
Supplement: Supplementary file 1 [file 22475981]

BOX 2. How to search for adverse drug reactions (ADR)

| The ADR search can be performed:   1. By trade name of the drug indicated as suspect in the report; 2. By name of the active ingredient or associations of active ingredients indicated as suspicious in the report (in this way the system will add all the reports related to drugs containing that or those active ingredients). |
| --- |
| The search results are displayed in 5 screen outputs:   1. the first one provides the total number of reports recorded in the National Surveillance Network divided by year; in the following screen outputs, the year has to be selected select from the drop-down menu at the top right; 2. the second provides the number and rate of reports by severity level; 3. the third provides the number and rate of reports divided by sex and age group of the subjects who have shown the adverse reaction(s); 4. the fourth provides the number and rate of ADRs aggregated by apparatus or organ concerned (SOC-System Organ Classification); 5. the fifth provides the number and the ADR rate aggregated in more detail (PT-Preferred Term). |
| The total of the ADRs can be equal to or greater than the total of the reports, as within each report it is possible to describe one or more ADRs |
| Source: Italian Drug Agency; http://www.agenziafaraco.gov.it/content/online-i-dati-sulle-segnalazioni-di-sospette-reazioni-avverse-registrate-nella-rete-nazional |
